# Supplementary material for: Role of bulge epidermal stem cells and TSLP signaling in psoriasis
Source: PubMed Central journal article supplement (PMC6835205; doi:10.15252/emmm.201910697), 2019-09-26
Supplement: EMMM-11-e10697-s001.pdf [file EMMM-11-e10697-s001.pdf]

# Role of bulge epidermal stem cells and TSLP signaling in psoriasis

Nuria Gago-Lopez et al.

## APPENDIX FIGURES AND LEGENDS

### Table of contents:

- **Appendix Figure S1.** Characterization of DKO<sup>\*</sup>-mT/mG mice during psoriasis-like progression.
- **Appendix Figure S2.** Dynamic pattern of GFP/Tomato epidermal cells in tail and back skin of DKO<sup>\*</sup>-mT/mG mice during psoriasis-like progression.
- **Appendix Figure S3.** FACS analyses of different epidermal stem cell populations in ear skin of Co-mT/mG and DKO<sup>\*</sup>-mT/mG mice during psoriasis-like progression.
- **Appendix Figure S4.** CD34 expression in bulge HF-SCs of DKO<sup>\*</sup>-mT/mG mice by immunofluorescence and FACS strategy for sorting.
- **Appendix Figure S5.** Mutant<sup>GFP</sup> keratinocytes induce hyper-proliferation in control<sup>Tom</sup> keratinocytes.
- **Appendix Figure S6.** Characterization of immune cell infiltration and TSLP signaling in DKO<sup>\*</sup> and DKO<sup>\*15</sup> mice treated with anti-TSLP.
- **Appendix Table S1. Primers for qPCR.**
- **Appendix Table S2. List of P-values.**

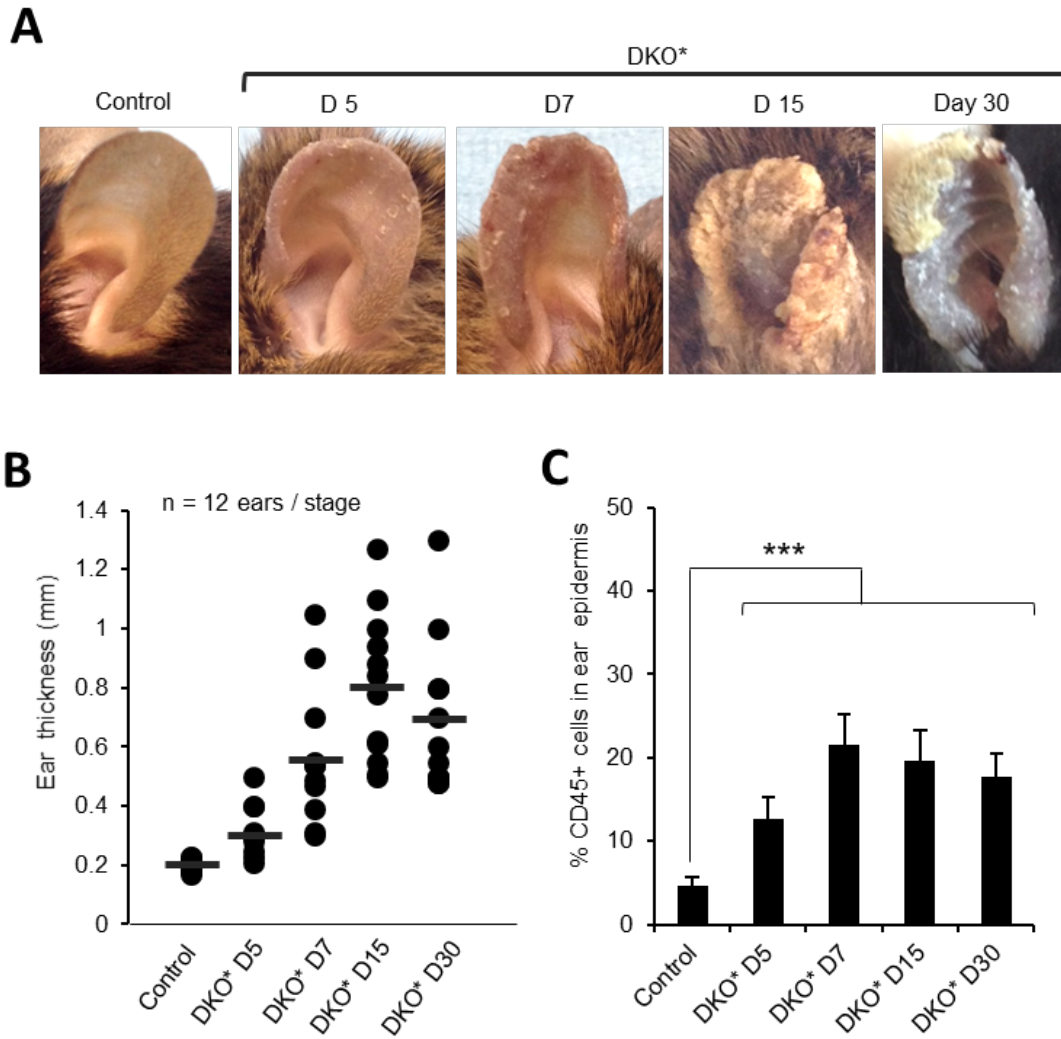

**Appendix Fig S1. Characterization of DKO<sup>\*</sup>-mT/mG mice during psoriasis-like progression.**

**A.** Images of ear skin at different time points during psoriasis-like development. Same control ear image was included in Fig. 3B.

**B.** Ear thickness measurement at different time points during psoriasis-like development.

**C.** FACS quantification of CD45<sup>+</sup> cells from ear skin of control and DKO<sup>\*</sup> mice at different time points during psoriasis-like development. n = 5-10 per time point. Statistical significance \*\*\*p<0.0001 (t-student two tailed-test relative to control group). See Supplemental Appendix Table 2 for exact p-Value.

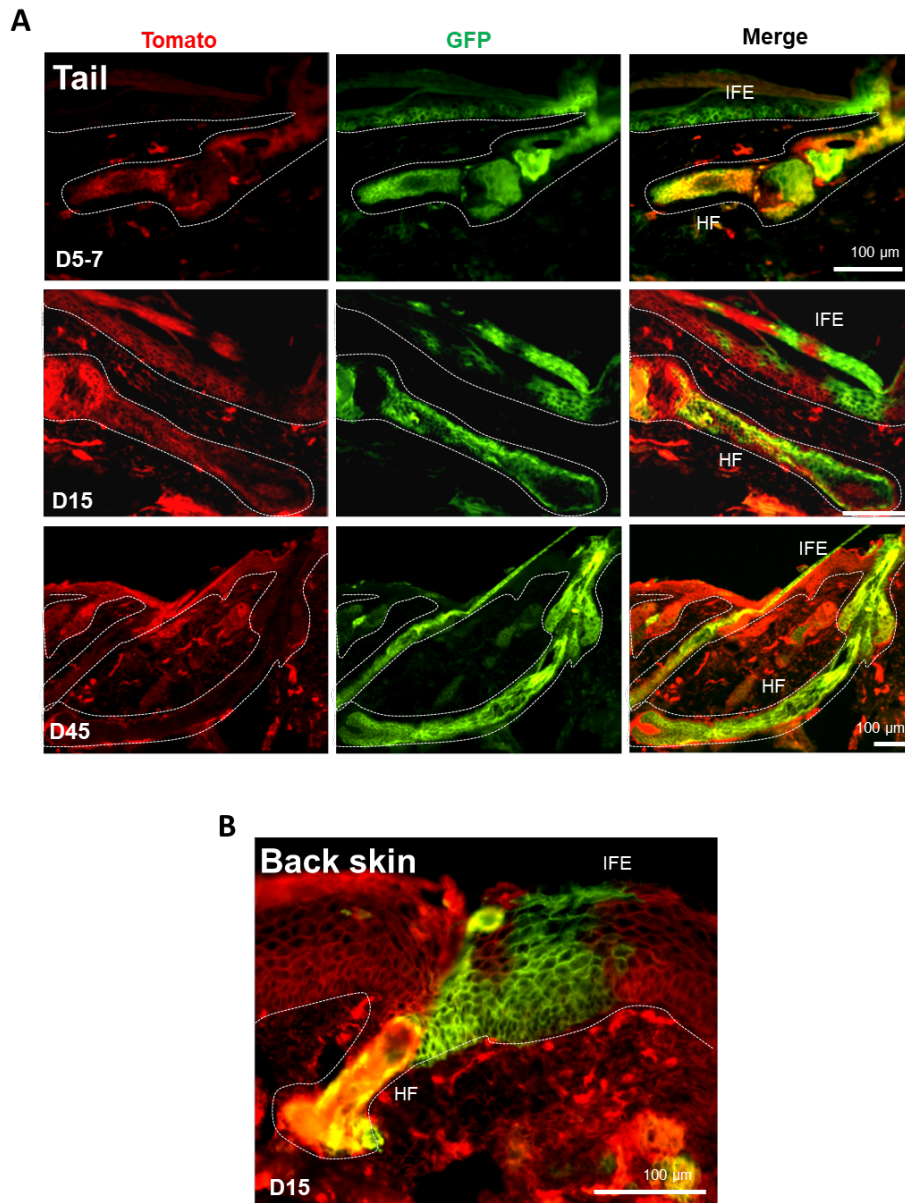

**Appendix Fig S2. Dynamic pattern of GFP/Tomato epidermal cells in tail and back skin of  $DKO^*$ -mT/mG mice during psoriasis-like progression.**

**A.** Fluorescence imaging of  $DKO^*$ -mT/mG tail skin at different time points during psoriasis-like progression. White dotted line separates epidermis and dermis.

**B.** Fluorescence imaging of  $DKO^*$ -mT/mG back skin at day 15 after tamoxifen treatment. White dotted line separates epidermis and dermis.

**A**

**Control-mT/mG : Into CD45-CD49f+ population**

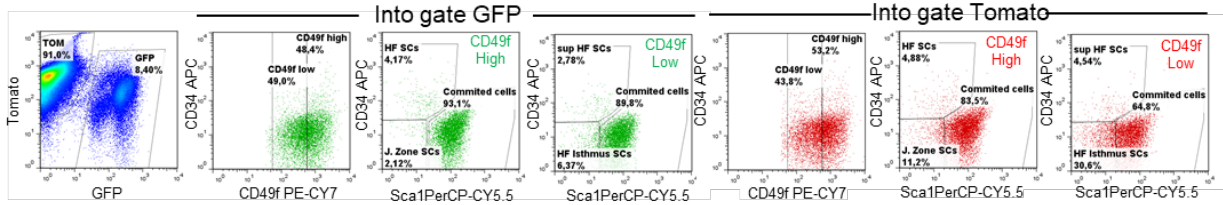

**DKO\*-mT/mG: Into CD45-CD49f+ population**

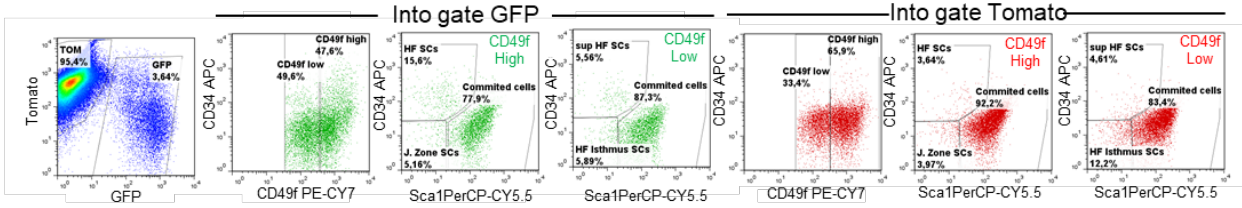

**B**

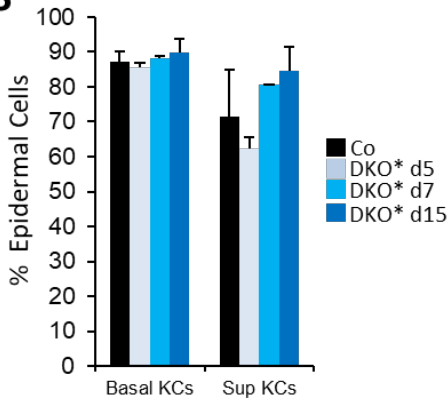

**C**

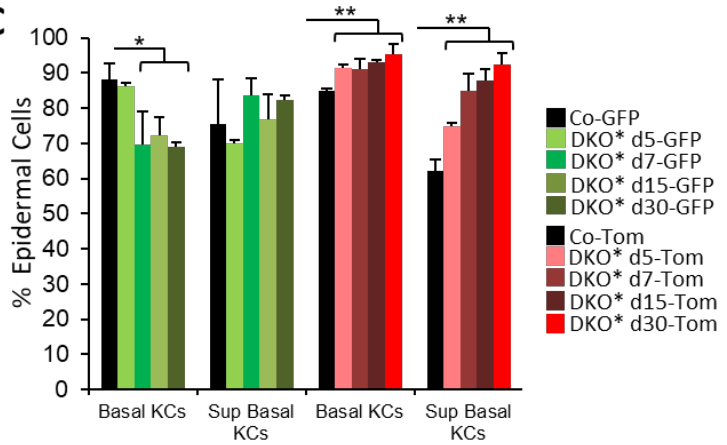

**D**

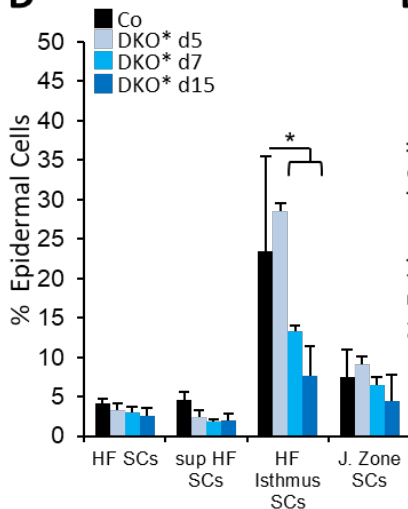

**E**

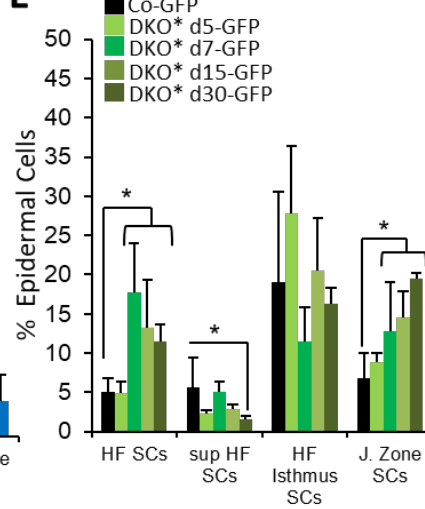

**F**

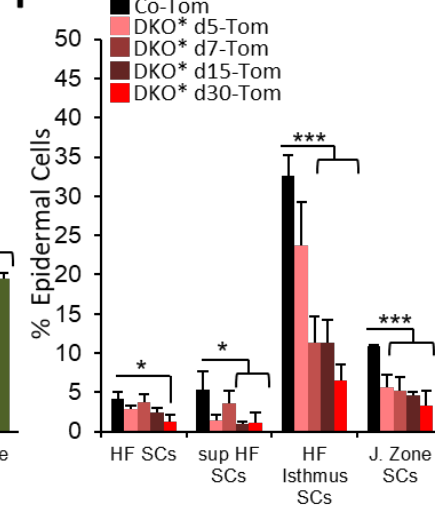

**Appendix Fig S3. FACS analyses of different epidermal stem cell populations in ear skin of Co-mT/mG and DKO\*-mT/mG mice during psoriasis-like progression.**

- A.** Strategy for FACS analysis of different epidermal stem cell populations in Co-mT/mG and DKO\*-mT/mG mice.
- B.** FACS quantification of basal and suprabasal keratinocytes from IFE at different time points during psoriasis-like development. n=3 per time point. Statistical significance \*p<0.05 (t-student two tailed-test relative to control groups). See Supplemental Appendix Table 2 for exact p-Value.
- C.** FACS quantification of basal and suprabasal keratinocytes from IFE into GFP<sup>+</sup> and Tomato<sup>+</sup> gating at different time points during psoriasis-like development. Reduction in mutant<sup>GFP</sup> IFE basal keratinocytes and enrichment of non-mutant<sup>Tom</sup> IFE populations. Statistical significance \*p<0.05 (t-student two tailed-test relative to control groups). See Supplemental Appendix Table 2 for exact p-Value.
- D.** FACS quantification of HF-SC subpopulations at different time points during psoriasis-like development. n=3 per time point. Statistical significance \*p<0.05 (t-student two tailed-test relative to control groups). See Supplemental Appendix Table 2 for exact p-Value.
- E.** FACS quantification of HF-SC subpopulations into GFP<sup>+</sup> gating at different time points during psoriasis-like development. Enrichment of bulge HF-SCs and junctional zone SCs. Statistical significance \*p<0.05 (t-student two tailed-test relative to control groups). See Supplemental Appendix Table 2 for exact p-Value.
- F.** FACS quantification of HF-SC subpopulations into Tomato<sup>+</sup> gating at different time points during psoriasis-like development. Reduction in all HF-SC subpopulations along psoriasis-like progression. Statistical significance \*p<0.05 (t-student two tailed-test relative to control groups). See Supplemental Appendix Table 2 for exact p-Value.

**A**

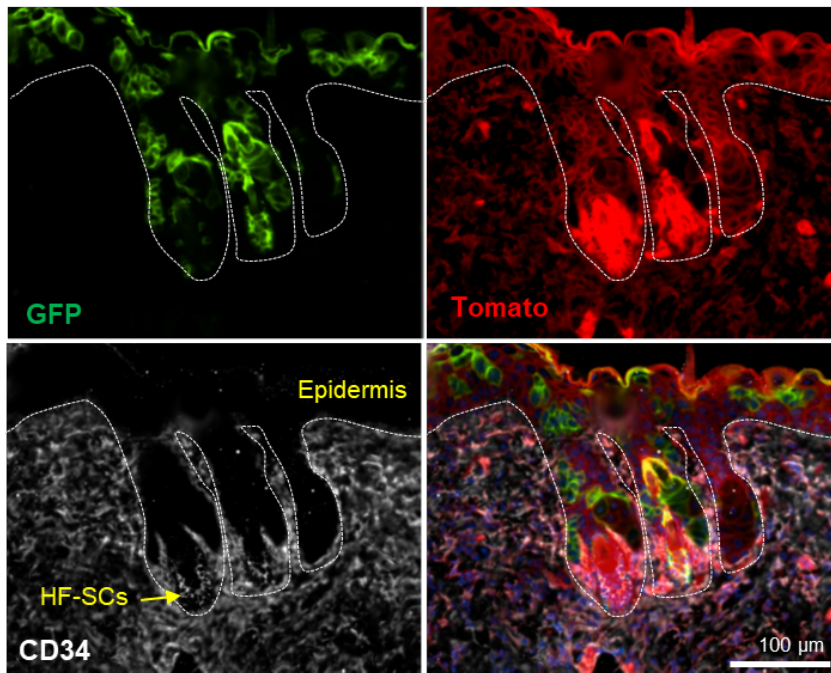

**B**

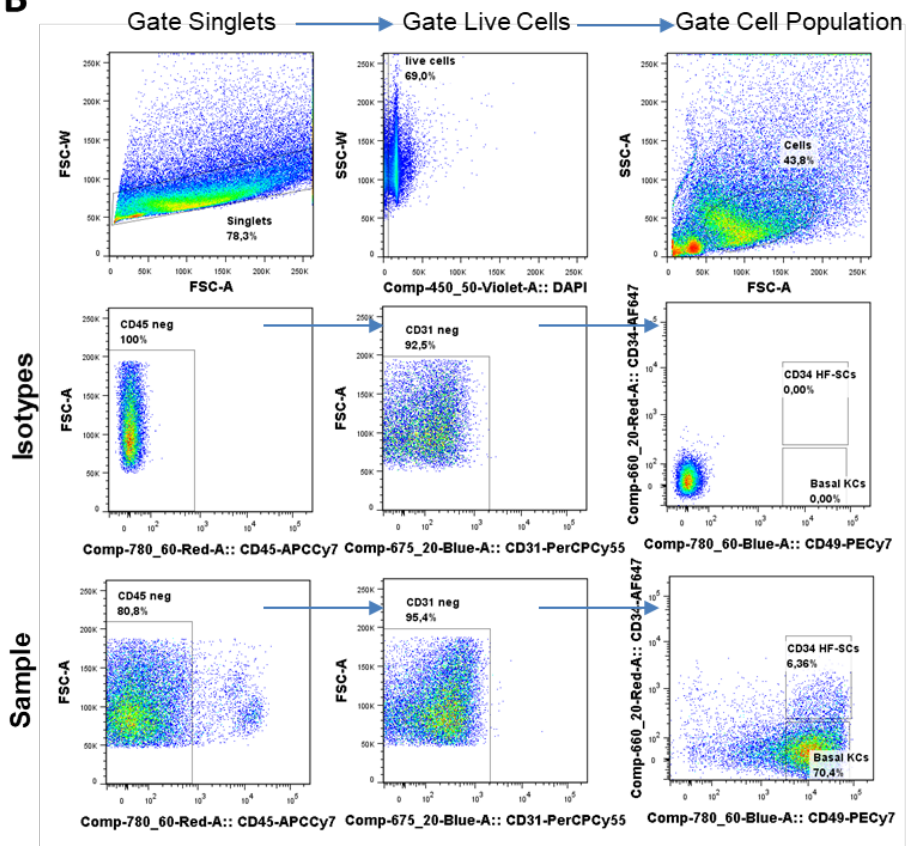

Appendix Fig S4. CD34 expression in bulge HF-SCs of DKO<sup>\*</sup>-mT/mG mice by immunofluorescence and FACS strategy for sorting.

**A.** Immunofluorescence image of CD34 staining in ear skin of psoriatic DKO\*-mT/mG mice.

White dotted line separates epidermis and dermis.

**B.** Strategy for FACS sorting of CD34 bulge HF-SCs and CD49f basal KCs. Sorting procedures were done excluding dead cells and doublets. Cell population positive for CD45 and CD31 were discarded and cells positive for CD34<sup>+</sup>/CD49f<sup>high</sup> and CD34<sup>-</sup>/CD49f<sup>high</sup> were sorted for further experiments.



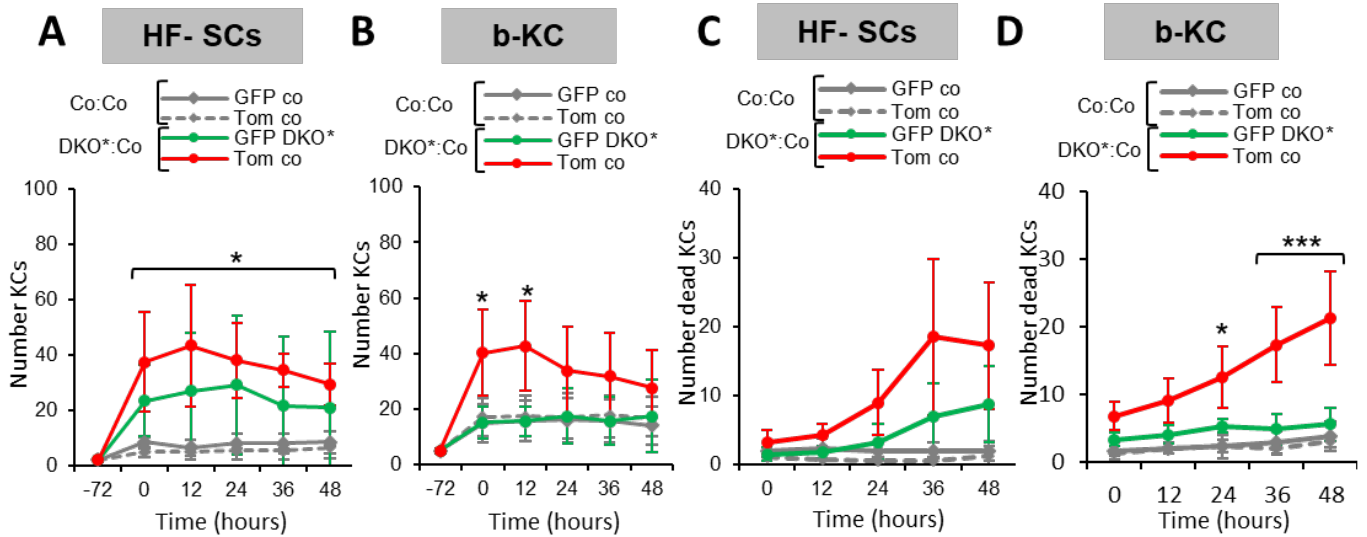

**Appendix Fig S5. Mutant<sup>GFP</sup> keratinocytes induce hyper-proliferation in control<sup>Tom</sup> keratinocytes.**

**A, B.** Average of total number of live and dead keratinocytes per field from co-cultures of mutant or control GFP<sup>+</sup> HF-SCs with control Tomato<sup>+</sup> HF-SCs at different time points of time lapse capture during 48 hours. n = 10-12 fields analyzed in total from two independent experiments. Statistical significance \*p<0.05 (Two-way ANOVA and Bonferroni post test).

**C, D.** Average of total number of live or dead keratinocytes per field from co-cultures of mutant or control GFP<sup>+</sup> basal keratinocytes with control Tomato<sup>+</sup> basal keratinocytes at different time points of time lapse capture during 48 hours. n = 4 fields from two independent experiments. Statistical significance \*p<0.05, \*\*\*p<0.001 (Two-way ANOVA and Bonferroni post test).



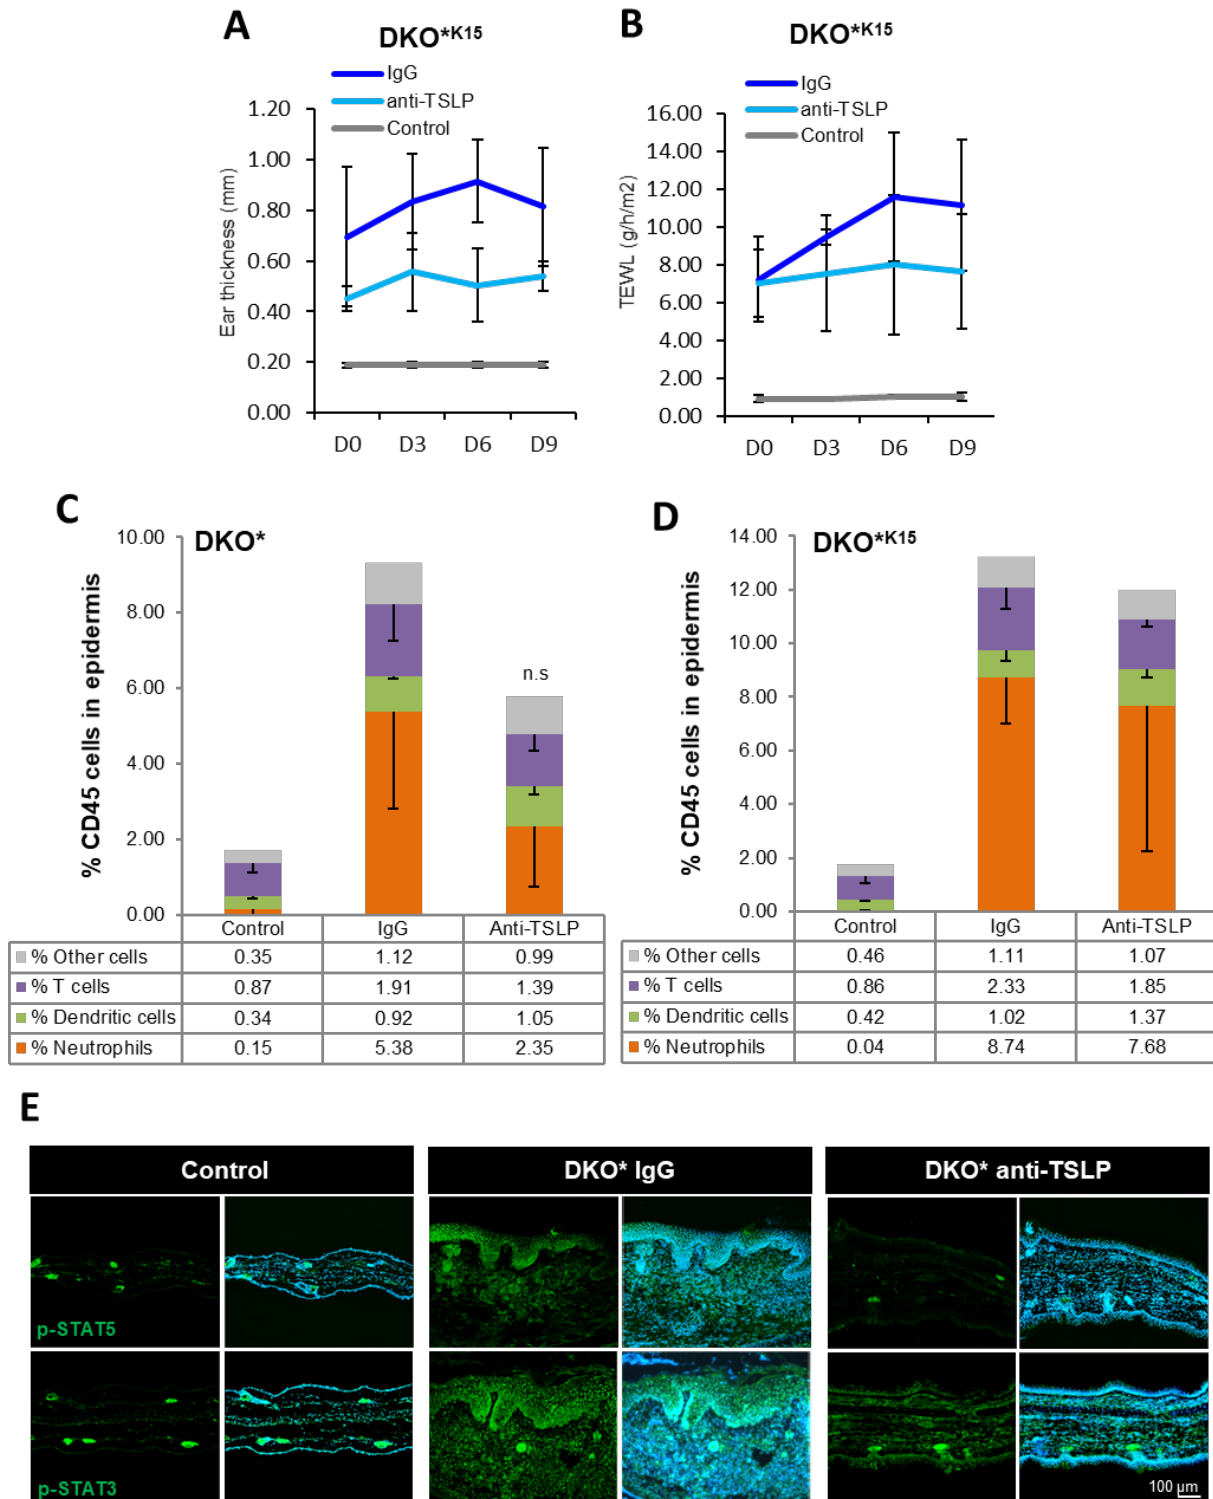

Appendix Fig S6. Characterization of immune cell infiltration and TSLP signaling in DKO\* and DKO\*<sup>15</sup> mice treated with anti-TSLP.

**A, B.** Longitudinal analysis of ear thickness (I) and Transepidermal water loss (TEWL) (J) in DKO\*<sup>15</sup> mice at different time points during psoriasis-like disease progression (Two-way ANOVA and Bonferroni post test, n=3, n.s = non statistical significance).

**C, D.** FACS quantification of immune cell subtypes (T cells, dendritic cells and neutrophils) on ear skin of DKO\* and DKO\*<sup>15</sup> mice after anti-TSLP or IgG treatment by FACS analysis. After anti-TSLP treatment, neutrophils are reduced in DKO\* mice. DKO\* n=4, DKO\*<sup>15</sup> n=3. n.s = non statistical significance (t-student two tailed-test relative to control groups).

**E.** Representative immune-fluorescence images of ear sections from DKO\* mice treated with IgG (left panel) or anti-TSLP (right panel) stained for p-STAT5 and p-STAT3. p-STAT5 expression was inhibited in mice treated with anti-TSLP, whereas p-STAT3 expression was maintained in both groups, IgG and anti-TSLP (n =3).

**Table S1. Primers for qPCR**

| <b>Name</b>      | <b>Sequence</b>             |
|------------------|-----------------------------|
| Tslp-F           | GAGGACTGTGAGAGCAAGCCAG      |
| Tslp-R           | GGCAGTGGTCATTGAGGGCTT       |
| Tslpr-F          | CGGGAGAGCAATGACGATG         |
| Tslpr-R          | CCGAACCCGGAAGTCATAGC        |
| IL-7 $\alpha$ -F | TGTGAGTTTCAATCCCGAAAGT      |
| IL-7 $\alpha$ -R | CTGGCTGTGCAGGAAGATCA        |
| Vegfa-F          | CAGTCCGAGCCGGAGAGGGAGC      |
| Vegfa-R          | CGGACGGCAGTAGCTTCGCTGG      |
| Foxc1a-F         | CACTCGGTGCGGGAAATGT         |
| Foxc1a-R         | GTGCGGTACAGAGACTGACTG       |
| Nfatc1-F         | GGCGGGAAGAAGATGGTGCTGTC     |
| Nfatc1-R         | TGGTTGCGGAAAGGTGGTATCTCA    |
| Ptgs2-F          | AAGCCGAGCACCTTTGGAG         |
| Ptgs2-R          | ATTGATGGTGGCTGTTTTGGTAG     |
| Tnfa-F           | CCCCAAAGGGATGAGAAGTT        |
| Tnfa-R           | CACTTGGTGGTTTGCTACGA        |
| Il-23a-F         | AGCGGGACATATGAATCTACTAAGAGA |
| Il-23a-R         | GTCCTAGTAGGGAGGTGTGAAGTTG   |
| Il-1 $\alpha$ -F | GGCTCACTTCATGAGACTTGC       |
| Il-1 $\alpha$ -R | AGGTGTAAGGTGCTGATCTGG       |
| Il-6-F           | CCGGAGAGGAGACTTCACAG        |
| Il-6-R           | CAGAATTGCCATTGCACAAC        |
| Il-1 $\beta$ -F  | GGGCTGGACTGTTTCTAATGCCTT    |
| Il-1 $\beta$ -R  | CCATCAGAGGCAAGGAGGAAAACA    |
| p65-F            | CCAAAAAGACGTGCCTCCTG        |
| p65-R            | CCCCCAGCCCATAGGGAAC         |
| G-CSF-F          | CTGCCACCATCCCTGCCTCT        |
| G-CSF-R          | CCATCTGCTGCCAGATGGTGGT      |
| IFN- $\gamma$ -F | GAAAATCCTGCAGAGCCAGATT      |
| IFN- $\gamma$ -R | TGATGGCCTGATTGTCTTTCAA      |
| S100a9-F         | GTTTGTGTCCAGGTCCTCC         |
| S100a9-R         | CACCTTCTCAGATGGAGCG         |

**Table S2. List of p-Values**

| Figure      | sample number | exact p-Value                                                                                                                                                                                                                               |
|-------------|---------------|---------------------------------------------------------------------------------------------------------------------------------------------------------------------------------------------------------------------------------------------|
| 1           | I n = 2-6     | Co vs Lesional: * = 0.021; Non Lesional vs Lesional: ** = 0.0044                                                                                                                                                                            |
| 1           | J n = 2-6     | Co vs Lesional: *** = 0.01; Non Lesional vs Lesional: *** = 0.0007                                                                                                                                                                          |
| 2           | D n = 6       | IFE Thickness. Co vs DKO* D5: n.s = 0.055; Co vs DKO* D7: ** = 0.0015; Co vs DKO* D15: *** = 0.0001; Co vs DKO* D30: *** = 0.0002                                                                                                           |
| 2           | E n = 3       | cCas3. DKO*GFP vs DKO*Tom D5: n.s = 0.13; DKO*GFP vs DKO*Tom D7: * = 0.044; DKO*GFP vs DKO*Tom D15: n.s = 0.79                                                                                                                              |
| 2           | E n = 3       | Ki67. DKO*GFP vs DKO*Tom D5: n.s = 0.87; DKO*GFP vs DKO*Tom D7: *** = 0.0007; DKO*GFP vs DKO*Tom D15: * = 0.05                                                                                                                              |
| 3           | D n = 5-12    | Co vs DKO* D5: * = 0.014; Co vs DKO* D7: ** = 0.0065; Co vs DKO* D15: *** = 0.0005; Co vs DKO* D30: ** = 0.0027; Co vs DKO15* D5: ** = 0.0032; Co vs DKO15* D7: *** = 0.0001; Co vs DKO15* D15: ** = 0.0014; Co vs DKO15* D30: *** = 0.0001 |
| 3           | E n = 4-6     | Co vs DKO* D5, D15, D30: *** < 0.00001; Co vs DKO15* D5, D15, D30: *** < 0.00001                                                                                                                                                            |
| 3           | F n = 6-10    | Co vs DKO* : *** = 0.0003; Co vs DKO15* : *** < 0.0001                                                                                                                                                                                      |
| 3           | G n = 4-5     | Co vs DKO* : * = 0.039; Co vs DKO15* : * = 0.035                                                                                                                                                                                            |
| 3           | H n = 4-5     | Co vs DKO* : ** = 0.0096; Co vs DKO15* : ** = 0.0038                                                                                                                                                                                        |
| 3           | I n = 3-6     | GFP. Co vs DKO* D5: n.s = 0.73; Co vs DKO* D15: ** = 0.0028; Co vs DKO* D30: ** = 0.0027; Co vs DKO15* D5: ** = 0.0026; Co vs DKO15* D15: ** = 0.0036; Co vs DKO15* D30: ** = 0.003                                                         |
| 3           | K n = 3-5     | cCas3. DKO15*GFP vs DKO15*Tom D5: n.s = 0.2; DKO15*GFP vs DKO15*Tom D7: n.s = 0.119; DKO15*GFP vs DKO15*Tom D15: ** = 0.0027                                                                                                                |
| 3           | K n = 3-5     | Ki67. DKO15*GFP vs DKO15*Tom D5: n.s = 0.06; DKO15*GFP vs DKO15*Tom D7: * = 0.012; DKO15*GFP vs DKO15*Tom D15: *** = 0.0001                                                                                                                 |
| 5           | D n = 3       | Co CD34 vs CD34GFP D7: ** = 0.0047; Co CD34 vs CD34GFP D30: * = 0.05; Co CD34 vs CD34Tom D7: ** = 0.0031; Co CD34 vs CD34Tom D30: ** = 0.0025; Co CD49f vs CD49fGFP D7: * = 0.02; Co CD49f vs CD49fGFP D30: * = 0.05                        |
| 5           | E n = 2       | Co CD34 vs CD34GFP D7: * = 0.017; Co CD34 vs CD34GFP D30: * = 0.05; Co CD34 vs CD34Tom D7: * = 0.016; Co CD34 vs CD34Tom D30: * = 0.011; Co CD49f vs CD49fGFP D7: * = 0.011; Co CD49f vs CD49fGFP D30: * = 0.012                            |
| 5           | F n = 4       | Co vs DKO* : ** = 0.0018; Co vs DKO15* : * = 0.04                                                                                                                                                                                           |
| 6           | B n = 3       | Ad-Empty vs Ad-Cre: *** < 0.0001                                                                                                                                                                                                            |
| 6           | D n = 3       | IgG vs AbTSLP Ad-Empty: * = 0.02; IgG vs AbTSLP Ad-Cre: * = 0.05                                                                                                                                                                            |
| 6           | E n = 3       | IgG vs AbTSLP Ad-Cre: * = 0.05                                                                                                                                                                                                              |
| 6           | F n = 3       | IgG vs AbTSLP Ad-Empty: ** = 0.007; IgG vs AbTSLP Ad-Cre: * = 0.011                                                                                                                                                                         |
| 6           | K n = 3       | IgG vs AbTSLP DKO* : * = 0.03; IgG vs AbTSLP DKO15* : * = 0.015                                                                                                                                                                             |
| 7           | B n = 3       | Control or non Lesional vs Lesional: *** = 0.001                                                                                                                                                                                            |
| 7           | C n = 3       | Control or non Lesional vs Lesional: ** = 0.04                                                                                                                                                                                              |
| EV3         | B n = 3       | Co vs DKO* D15: *** = 0.0001                                                                                                                                                                                                                |
| EV3         | C n = 3       | Co vs DKO* D15: *** = 0.0001                                                                                                                                                                                                                |
| EV3         | D n = 3       | Co CD34 vs CD34GFP D7: ** = 0.007                                                                                                                                                                                                           |
| EV4         | F n = 3-4     | Co CD34 vs CD34GFP: * = 0.015; Co CD34 vs CD34Tom: n.s = 0.089                                                                                                                                                                              |
| EV4         | G n = 3-4     | Co CD34 vs CD34GFP: * = 0.021                                                                                                                                                                                                               |
| EV4         | H n = 3       | Co CD34 vs CD34GFP: * = 0.017; Co CD34 vs CD34Tom: * = 0.016                                                                                                                                                                                |
| EV4         | I n = 3       | Co CD34 vs CD34GFP: * = 0.035                                                                                                                                                                                                               |
| EV4         | J n = 3       | Co CD34 vs CD34Tom: * = 0.024; Co CD49f vs CD49fTom: n.s = 0.18                                                                                                                                                                             |
| EV4         | K n = 3       | Co CD49f vs CD49fTom: ** = 0.0077                                                                                                                                                                                                           |
| EV4         | L n = 3       | All cell subpopulations in relation with the control: ** < 0.0011                                                                                                                                                                           |
| EV5         | E n = 2       | Ad-cre IgG GFP vs Ad-cre AbTSLP GFP: * = 0.047                                                                                                                                                                                              |
| EV5         | F n = 2       | Ad-cre IgG GFP vs Ad-cre AbTSLP GFP: * = 0.05                                                                                                                                                                                               |
| EV5         | G n = 2       | Ad-cre IgG GFP vs Ad-cre AbTSLP GFP: n.s = 0.2; Ad-cre IgG Tom vs Ad-cre AbTSLP Tom: * = 0.05                                                                                                                                               |
| EV5         | H n = 2       | Ad-cre IgG Tom vs Ad-cre AbTSLP Tom: n.s = 0.08                                                                                                                                                                                             |
| EV5         | I n = 2       | Ad-cre IgG GFP vs Ad-cre AbTSLP GFP: * = 0.05                                                                                                                                                                                               |
| EV5         | J n = 2       | Ad-cre IgG GFP vs Ad-cre AbTSLP GFP: * = 0.05                                                                                                                                                                                               |
| EV5         | L n = 2       | Ad-cre IgG GFP vs Ad-cre AbTSLP GFP: * = 0.029                                                                                                                                                                                              |
| Appendix S1 | C n = 5-10    | Co vs DKO* D5, D15, D30: *** < 0.00001                                                                                                                                                                                                      |
| Appendix S3 | C n = 3       | b-KCs Co vs b-KCs GFP D7-30: * = 0.042; b-KCs Co vs b-KCs Tom D7-30: ** = 0.003; Supb-KCs Co vs Supb-KCs Tom D7-30: ** = 0.0012                                                                                                             |
| Appendix S3 | D n = 3       | HF Isthmus SCs Co vs HF Isthmus SCs D7-15: * = 0.05                                                                                                                                                                                         |
| Appendix S3 | E n = 3       | HF-SCs Co vs HF-SCs GFP D7-30: * = 0.03; Sup HF-SCs Co vs Sup HF-SCs GFP D30: * = 0.05; J. Zone SCs Co vs J. Zone SCs GFP D30: * = 0.012                                                                                                    |
| Appendix S3 | F n = 3       | HF-SCs Co vs HF-SCs Tom D30: * = 0.04; Sup HF-SCs Co vs Sup HF-SCs Tom D15-30: * = 0.05; HF Isthmus SCs Co vs HF Isthmus SCs Tom D7-30: *** = 0.0006; J. Zone SCs Co vs J. Zone SCs Tom D30: *** = 0.0004                                   |
