# Supplementary material for: Role of bulge epidermal stem cells and TSLP signaling in psoriasis
Source: PubMed Central journal article supplement (PMC6835205; doi:10.15252/emmm.201910697), 2019-09-26
Supplement: EMMM-11-e10697-s002.pdf [file EMMM-11-e10697-s002.pdf]

## Expanded View Figures

**Figure EV1. Characterization of c-JUN/JUNB in distinct hair follicle stem cell populations from scalp psoriasis patients (related to Fig 1).**

- A Confocal images of the bulge region of human psoriatic hair follicles from non-lesional and lesional regions of the scalp. CD200 (green), c-JUN (red), DAPI (blue).
- B, C Representative composite immunofluorescence images of whole hair follicle units by confocal from non-lesional and lesional scalp psoriasis patients (B) and magnification images of specific regions from the HFs (C). c-JUN (green), JUNB (gray), GATA-6 (red), and DAPI (blue). Yellow arrows represent the outer root sheath basal layer in the bulge (R1, R3) and proximal bulb (Pb, R2, R4). Yellow asterisks represent overexpression of GATA-6 in suprabasal layers of the outer root sheath in lesional bulge region.

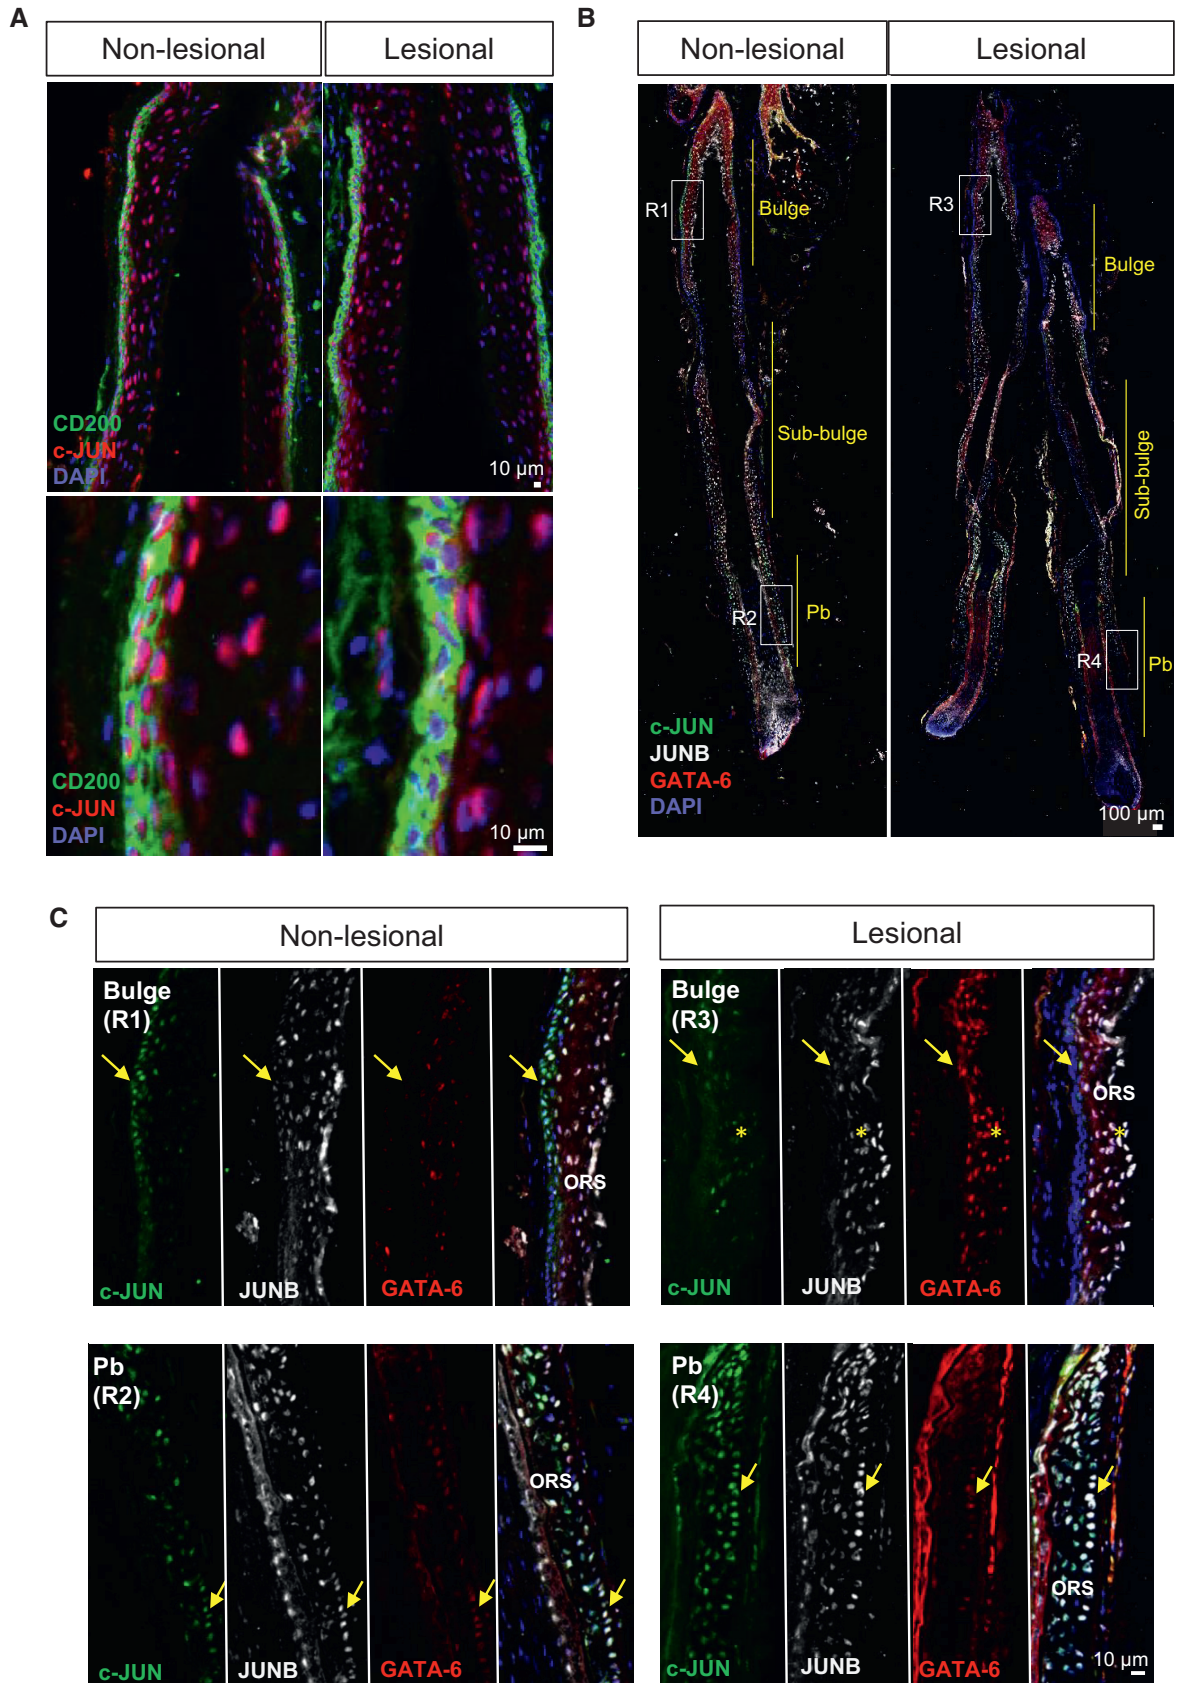

Figure EV1.

**Figure EV2. Validation of the lineage tracing system in Co-mT/mG and DKO\*-mT/mG mice (related to Fig 2).**

- A Whole mount of ear skin from co-mT/mG mice before (VEHICLE) and after tamoxifen at day 15. White arrows represent isolated spots of GFP in vehicle skin.
- B Immunofluorescence images of Co-mT/mG ear skin sections and DKO\*-mT/mG at day 15 after tamoxifen treatment, co-stained with K5 (white). Yellow dotted line separates epidermis and dermis.
- C Immunofluorescence images of c-Jun and JunB staining in DKO\*-mT/mG at day 15 after tamoxifen treatment showing GFP<sup>+</sup> keratinocytes are negative for c-Jun and JunB expression. GFP (green), Tomato (red), JunB and c-Jun (white), DAPI (blue). Yellow dotted line separates epidermis and dermis.
- D Representative images of whole mounts of ear skin from DKO\*-mT/mG at day 0 after tamoxifen treatment in two views, from the epidermis and from the dermis, to distinguish the expression of GFP<sup>+</sup> epidermal cell into the IFE and HFs.

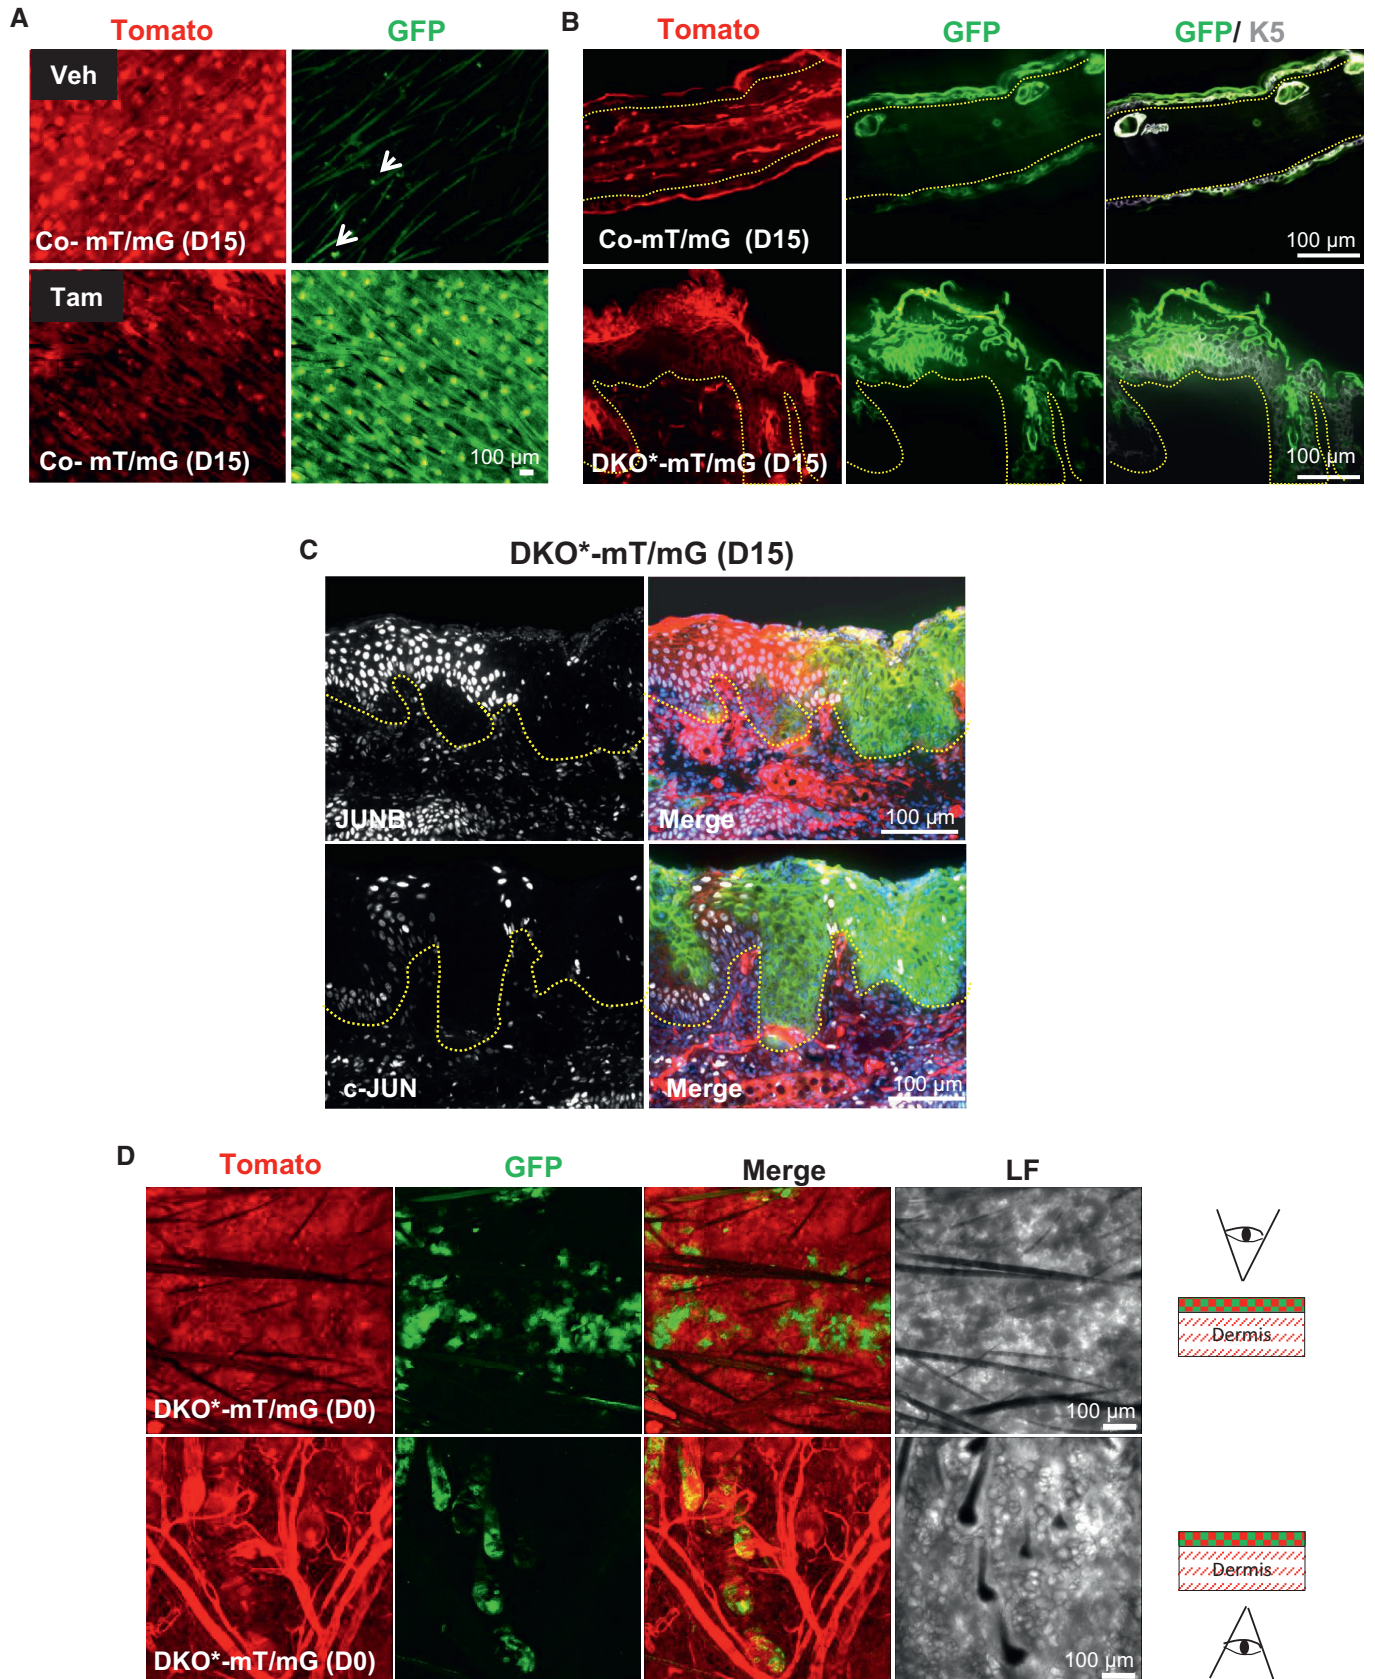

Figure EV2.

**Figure EV3. Mutant<sup>GFP</sup> bulge HF-SCs are active and initiate psoriasis-like development (related to Fig 3).**

- A Immunofluorescence images of the ears of control (Co) and DKO\* mice showing co-expression of mutant<sup>GFP</sup> with CD34 (red arrows) in HF-SCs.  $n = 3$ . Scale bar = 50  $\mu\text{m}$ .
- B, C Gene expression of quiescence transcription factors, Foxc1a and Nfatc1 show that HF-SCs exit the quiescent stage during psoriasis-like development in DKO\* mice.  $n = 3$  mice per group. Data represent mean  $\pm$  SD. Statistical significance \*\*\* $P < 0.001$  (Student's two-tailed  $t$ -test relative to control group). See Appendix Table S2 for exact  $P$ -values.
- D Colony formation *in vitro* of bulge hair follicle stem cells (HF-SCs, CD34<sup>+</sup> CD49<sup>high</sup>) vs. basal keratinocytes (b-KCs, CD49<sup>high</sup>) from control and DKO\*-mT/mG ears shows that mutant<sup>GFP</sup> HF-SCs have significant increased colony formation when compared to non-mutant<sup>Tom</sup> HF-SCs or control HF-SCs.  $n = 3$  mice per group. Data represent mean  $\pm$  SD. Statistical significance \*\* $P < 0.01$  (Student's two-tailed  $t$ -test relative to control groups). See Appendix Table S2 for exact  $P$ -values.
- E Representative images of whole mount of ear skin from DKO\*<sup>K15</sup>-mT/mG at day 0 after mifepristone treatment in two views from the epidermis and from the dermis, to distinguish the expression of GFP<sup>+</sup> epidermal cell in IFE and HF.
- F Immunofluorescence images of c-Jun and JunB staining in DKO\*<sup>K15</sup>-mT/mG at days 5–7 after tamoxifen treatment show GFP<sup>+</sup> keratinocytes are negative for c-Jun and JunB expression.
- G Representation of both epidermal lineage-tracking system, DKO\*-mT/mG and DKO\*<sup>K15</sup>-mT/mG, for investigating the origin and contribution of epidermal stem cells in the development of psoriasis-like.

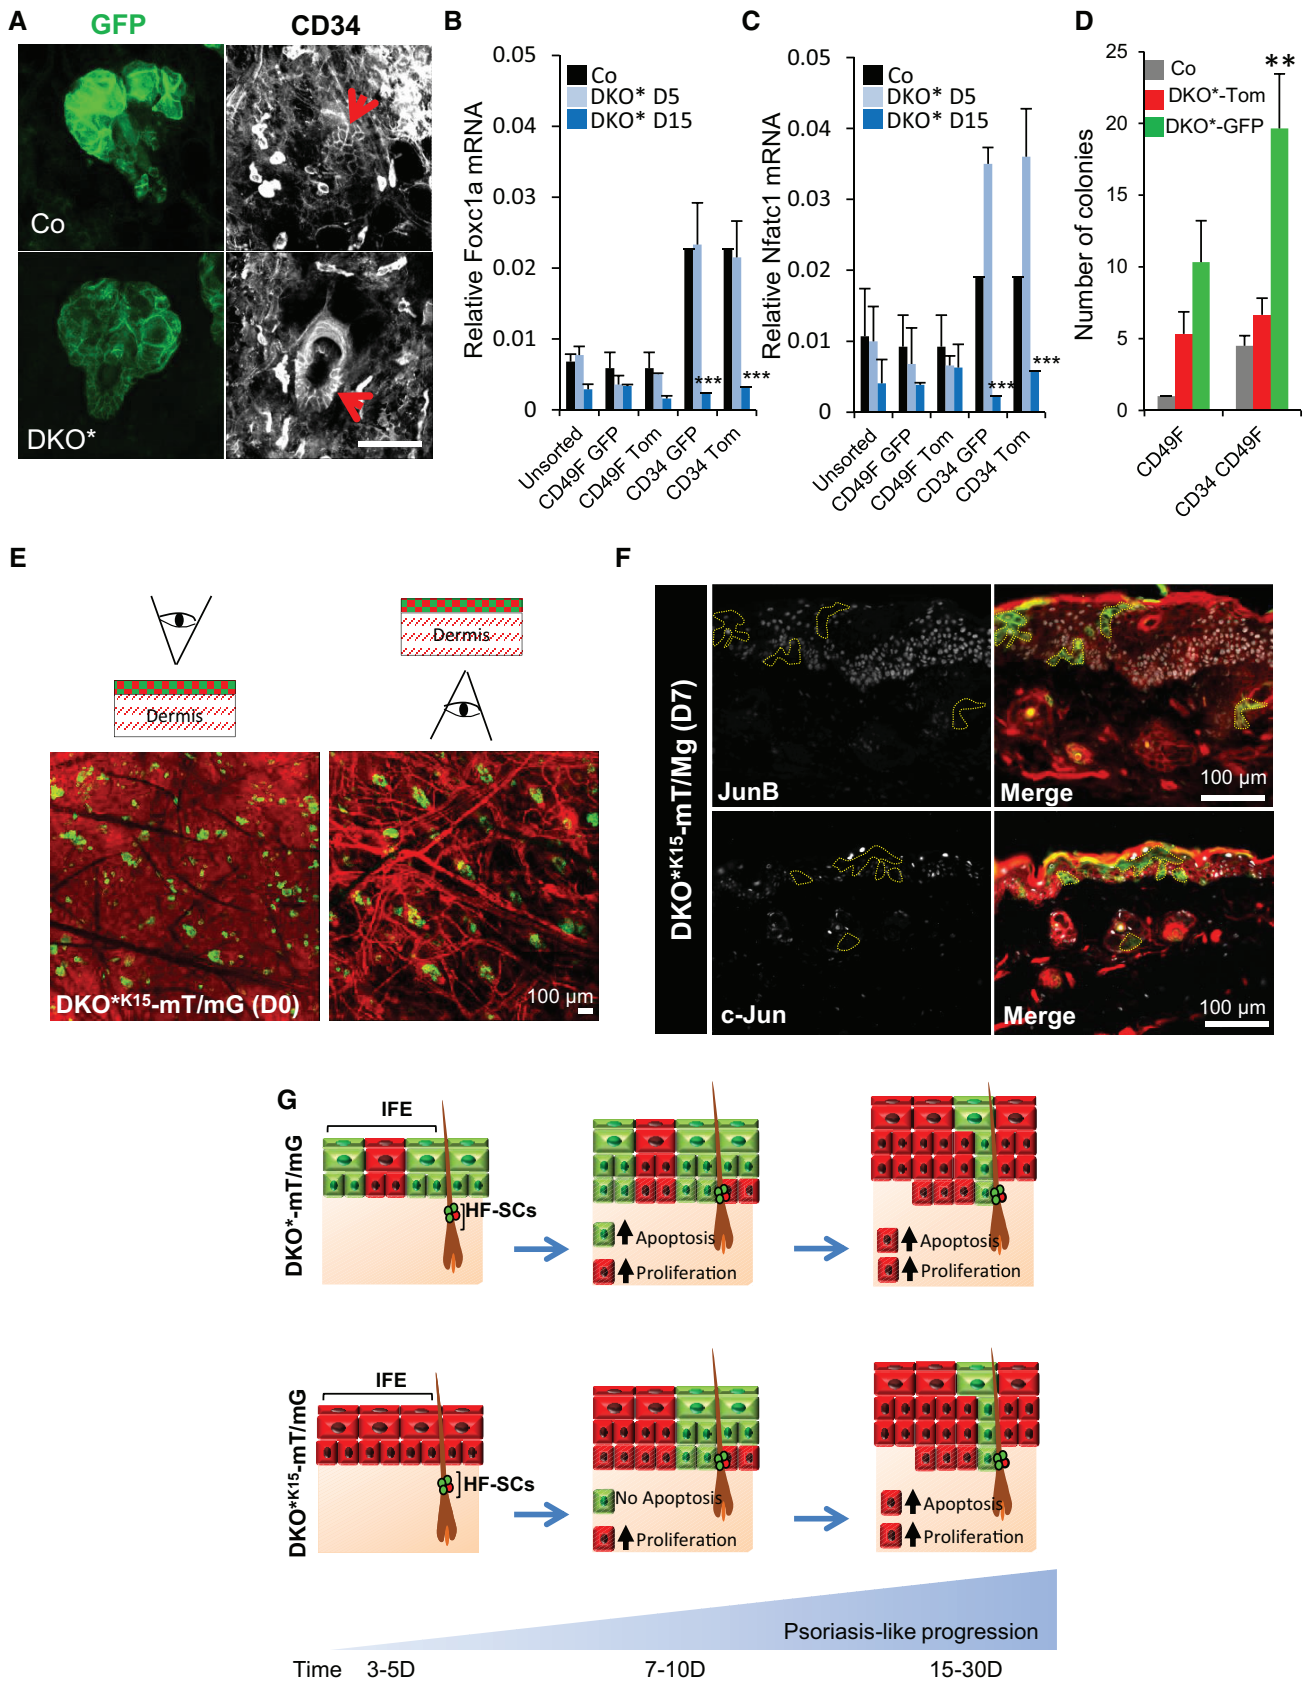

Figure EV3.

**Figure EV4. Isolation of bulge HF-SCs and basal keratinocytes from Co-mT/mG and DKO\*-mT/mG ear skin for RNA-seq and gene expression profiling (related to Fig 5).**

- A Hair follicle stem cells (HF-SC, CD34<sup>+</sup> CD49<sup>high</sup>) and basal keratinocytes (b-KC, CD49<sup>high</sup>) from ear skin of DKO\*-mT/mG collected at day 7 after tamoxifen induction were sorted by FACS for GFP<sup>+</sup> vs. Tomato<sup>+</sup>. HF-SCs (CD34<sup>+</sup> CD49<sup>high</sup>) and b-KC (CD49<sup>high</sup>) from control mice were also sorted to sequence the RNA. *n* = 3 mice per condition. Differentially expressed genes were obtained by the comparison of mutant cell populations with their same cell populations from control mice.
- B, C Overlapping of differentially expressed genes (DEGs) from the four subpopulations (HF-SC<sup>GFP</sup>; HF-SC<sup>Tom</sup>; b-KC<sup>GFP</sup>; and b-KC<sup>Tom</sup>) by Venn diagram.
- D, E Heat map of up (C)- and down (D)-regulated biological processes based on Gene Ontology IDs for DEGs commonly up- and down-regulated in the four subpopulations (HF-SC<sup>GFP</sup>; HF-SC<sup>Tom</sup>; b-KC<sup>GFP</sup>; and b-KC<sup>Tom</sup>)
- F–L Gene expression for Ptg2s, TNF $\alpha$ , IL-23a, IL-1 $\alpha$ , IL-6, IL-1 $\beta$ , and S100a9 in the different epidermal cell subpopulations sorted at mid-term of psoriasis-like development from DKO\* mice. *n* = 3 mice. Data represent mean  $\pm$  SD. Statistical significance \**P* < 0.05, \*\**P* < 0.01 (Student's two-tailed *t*-test relative to control groups). See Appendix Table S2 for exact *P*-values.

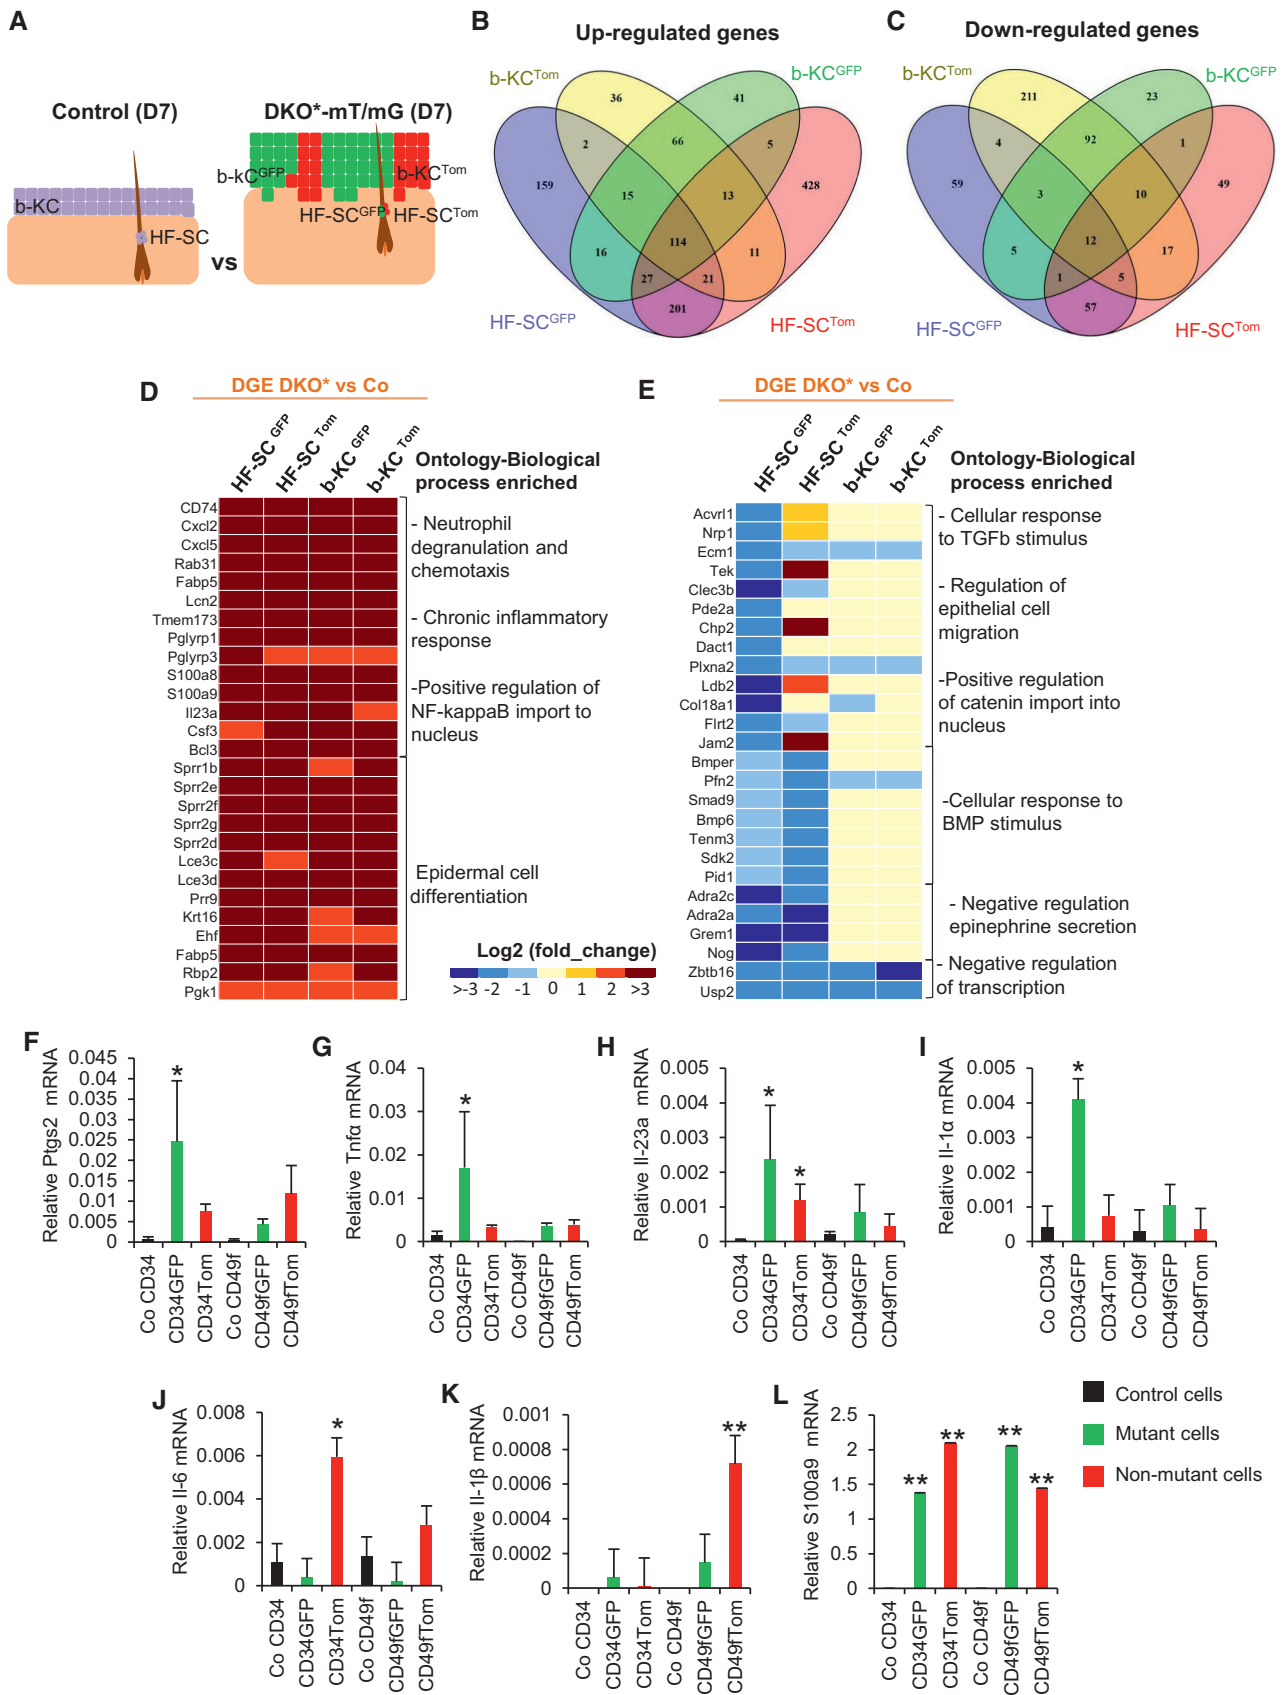

Figure EV4.



**Figure EV5. Regulation of keratinocyte proliferation and pro-inflammatory mediators by TSLP (related to Fig 6).**

- A Immunofluorescence images of TSLPR (green) and EdU (red) staining in primary keratinocyte cultures from wild-type (WT) mouse skin treated with recombinant TSLP during 48 h.
- B Percentage of EdU<sup>+</sup> WT keratinocytes after blocking with recombinant TSLP at different concentrations in culture. WT keratinocytes responded to recombinant TSLP treatment and increased their proliferation.  $n = 3$  independent experiments. Data represent mean  $\pm$  SD. Statistical significance  $^{**}P < 0.01$  (two-way ANOVA and Bonferroni post-test). See Appendix Table S2 for exact  $P$ -values.
- C Percentage of EdU<sup>+</sup> WT keratinocytes derived from bulge HF-SCs (CD34<sup>+</sup>) and basal keratinocytes (CD49f<sup>+</sup>) after treating with TSLP recombinant in culture. Bulge HF-SCs increased the proliferation rate rather than basal keratinocytes.  $n = 2$  independent experiments. Data represent mean  $\pm$  SD. Statistical significance  $^{*}P < 0.05$ ,  $^{***}P < 0.001$  (two-way ANOVA and Bonferroni post-test). See Appendix Table S2 for exact  $P$ -values.
- D Experimental design for induction of mutant<sup>GFP</sup> KCs *in vitro* and neutralization of secreted TSLP by anti-TSLP. Primary keratinocytes were cultured from the skin of Junb<sup>lox/lox</sup>; c-Jun<sup>lox/lox</sup>; Rosa<sup>Ki/+</sup>; and K5cre-ERT<sup>+/+</sup> mice. 50% of mutant<sup>GFP</sup> KCs were induced by infection with Cre Adenovirus, and the non-infected cells were non-mutant<sup>Tom</sup> KCs. Adeno-empty was used as control. After neutralization, GFP<sup>+</sup> and Tomato<sup>+</sup> KCs were sorted by FACS and RNA isolation was carried out for further gene expression profiling.
- E–M Gene expression profiling of Tslpr, IL-7ra, VEGF $\alpha$ , IL-6, IL-1 $\beta$ , p65, IFN- $\gamma$ , G-CSF, and S100a9 in sorted GFP vs. Tom KCs after TSLP neutralization.  $n = 2$  independent experiments. Data represent mean  $\pm$  SD. Statistical significance  $^{*}P < 0.05$  (Student's two-tailed t-test relative to control group). See Appendix Table S2 for exact  $P$ -value.

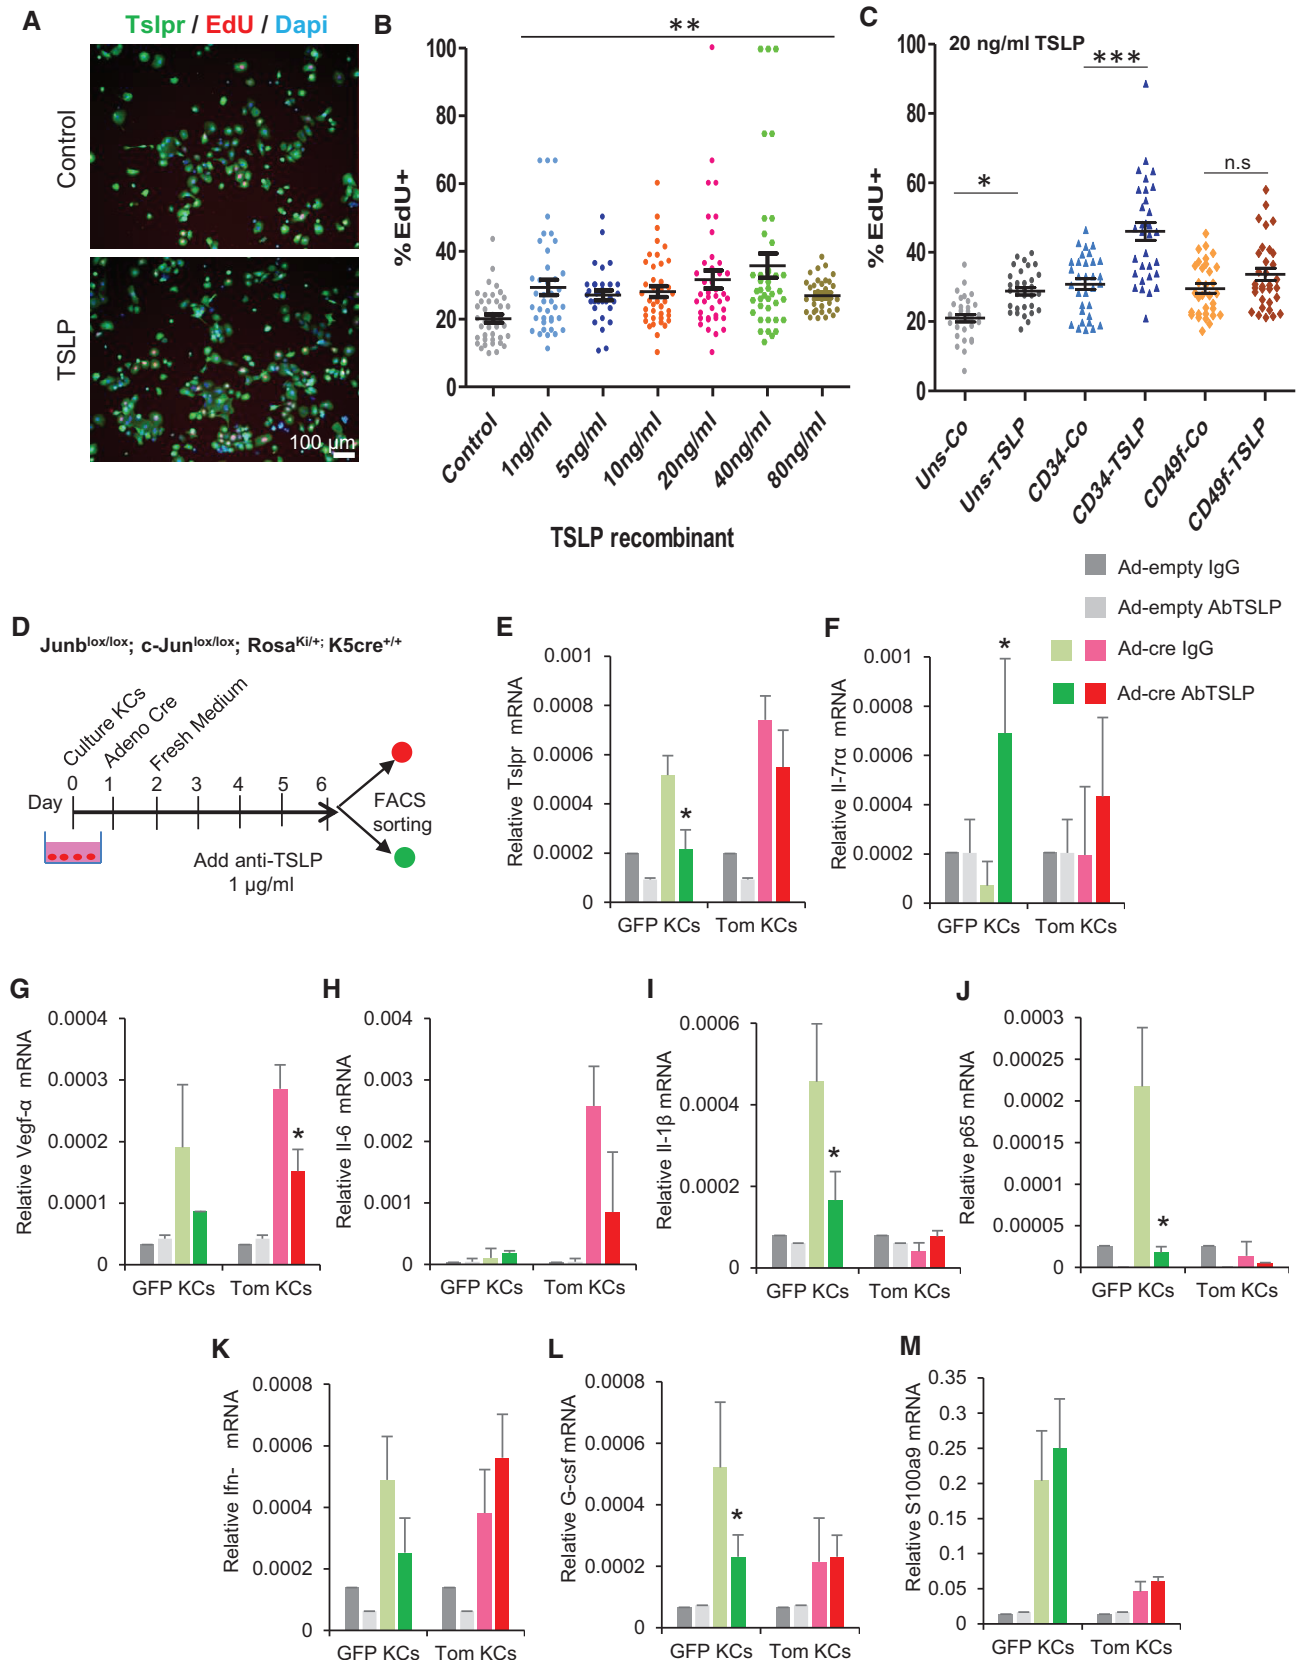

Figure EV5.
